# Supplementary material for: FePd alloy nanoparticles assembled on reduced graphene oxide as a catalyst for selective transfer hydrogenation of nitroarenes to anilines using ammonia borane as a hydrogen source
Source: Royal Society of Chemistry journal article supplement (doi:10.1039/c6cy00118a), 2016-01-01

## Supporting Information

### FePd Alloy Nanoparticles Assembled on Reduced Graphene Oxide as Catalyst for Selective Transfer Hydrogenation of Nitroarenes to Anilines Using Ammonia Borane as a Hydrogen Source

Önder Metin,<sup>\*,[a]</sup> Adriana Mendoza-Garcia,<sup>[b]</sup> Diğdem Dalmızrak,<sup>[a]</sup> Mehmet Serdar Gültekin,<sup>[a]</sup> and Shouheng Sun<sup>\*,[b]</sup>

<sup>[a]</sup>Department of Chemistry, Faculty of Science, Atatürk University, Erzurum 25240, Turkey

<sup>[b]</sup>Department of Chemistry, Brown University, Providence, Rhode Island 02912, USA

e-mail: [ometin@atauni.edu.tr](mailto:ometin@atauni.edu.tr) (Ö. Metin); [ssun@brown.edu](mailto:ssun@brown.edu) (S. Sun)

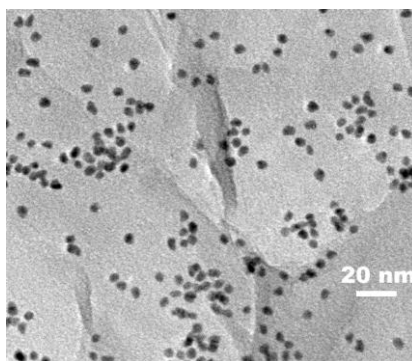

**Figure S1.** A representative TEM image of rGO-Pd catalyst.

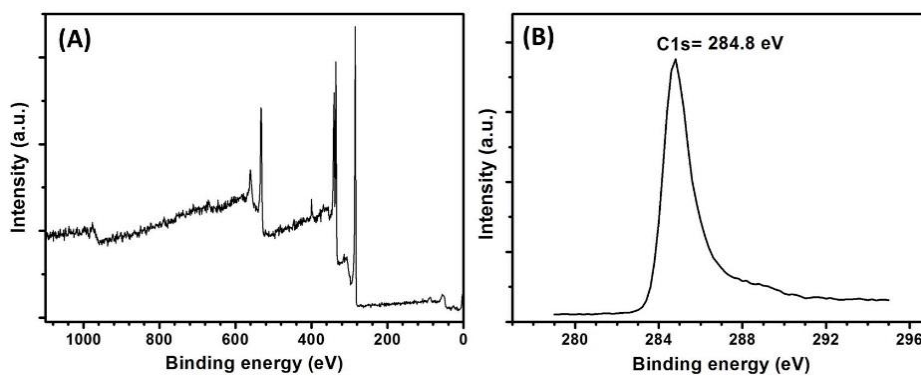

**Figure S2.** XPS of the rGO-Fe<sub>48</sub>Pd<sub>52</sub> catalyst (A) Survey (B) C1s region.

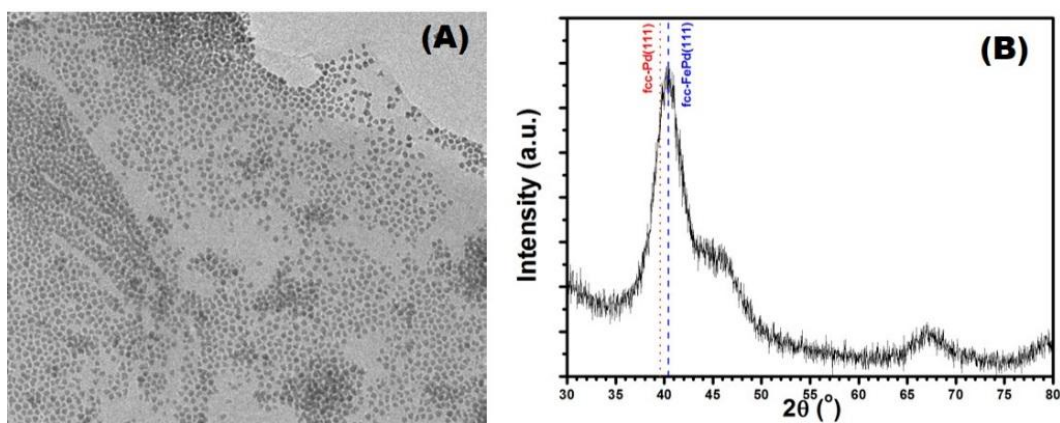

**Figure S3.** (A) A representative TEM image (B) XRD pattern of rGO-Fe<sub>48</sub>Pd<sub>52</sub> catalyst after the 5 reaction cycles.

**<sup>1</sup>H-NMR and <sup>13</sup>C-NMR spectra of the catalysis studies presented by Table 1**

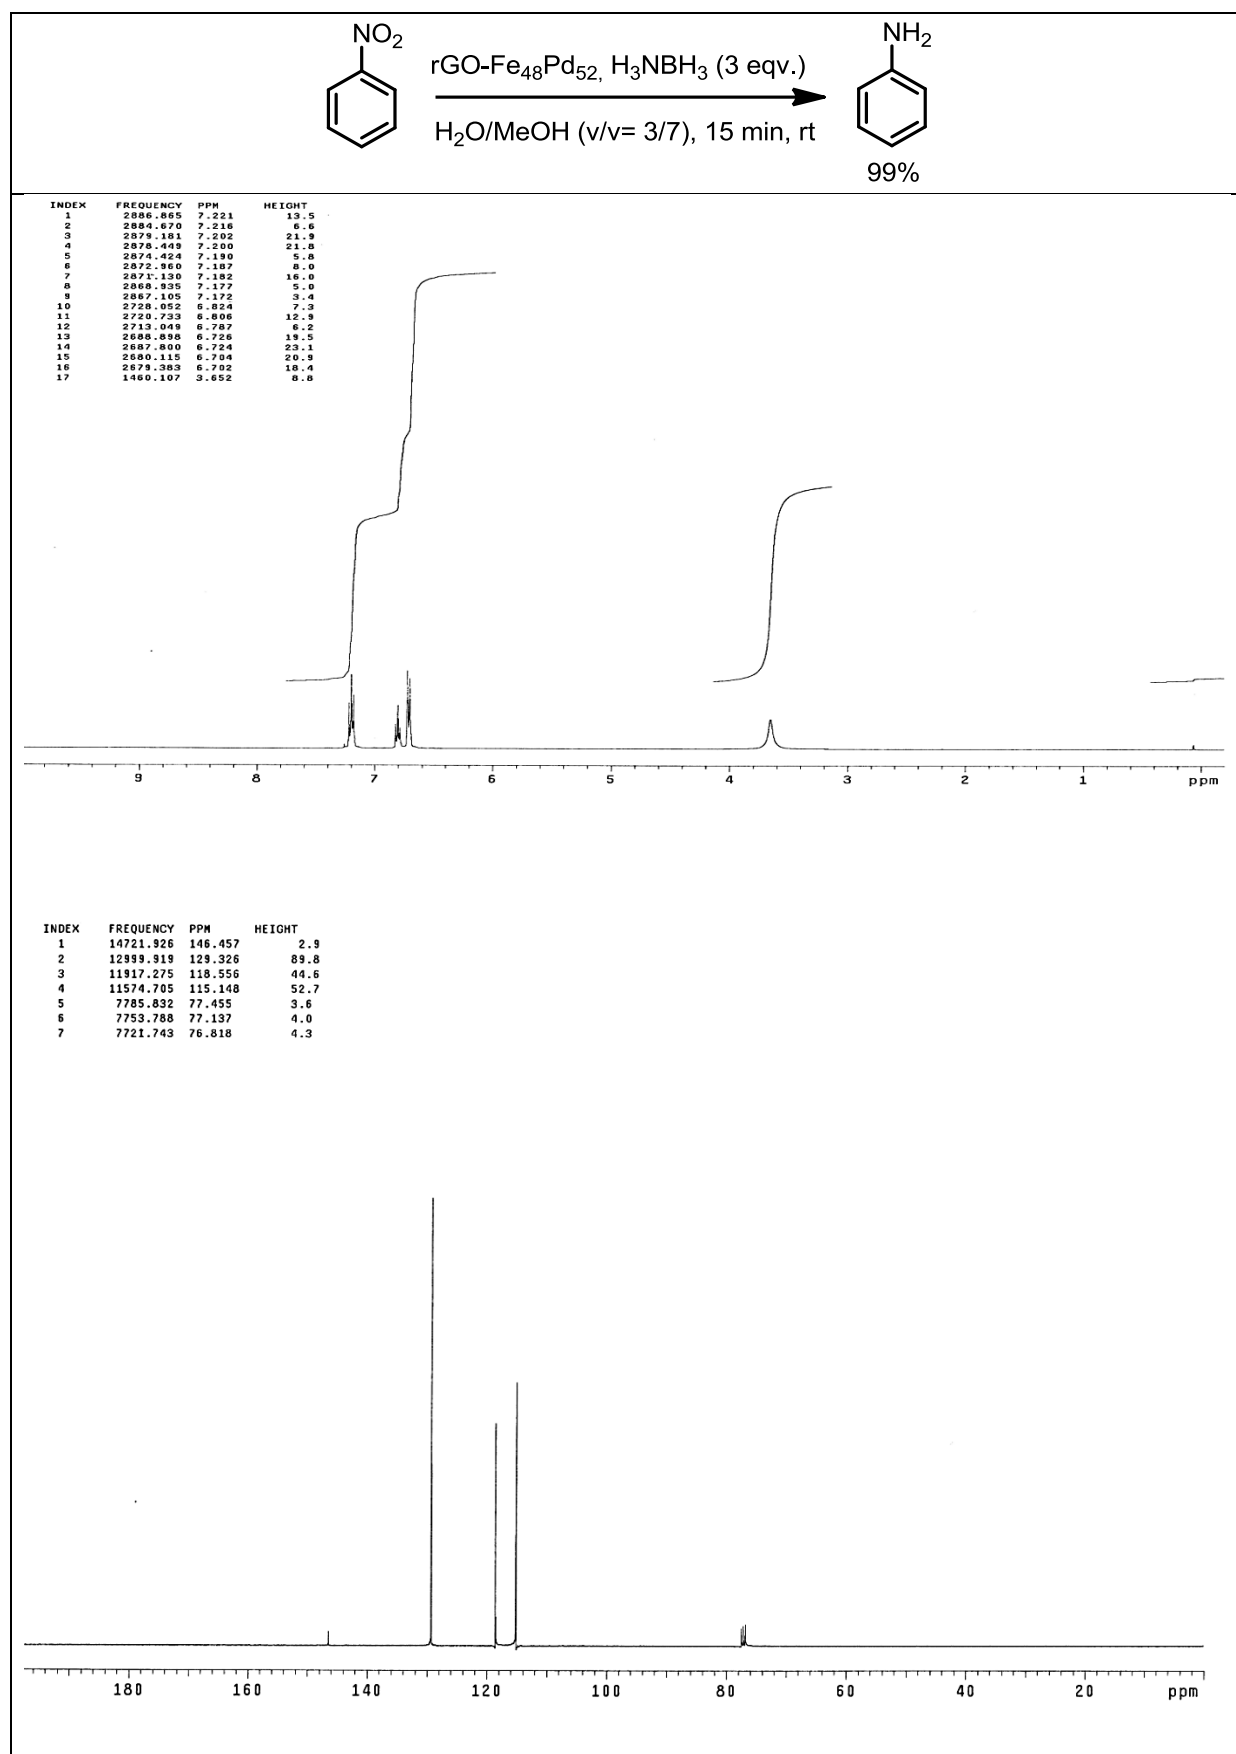

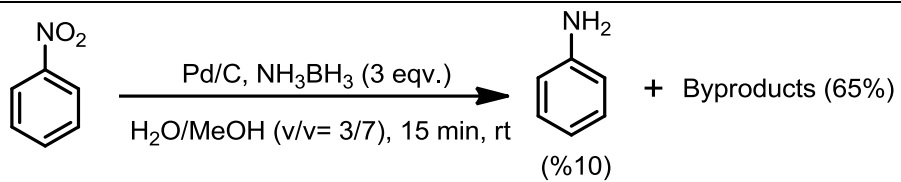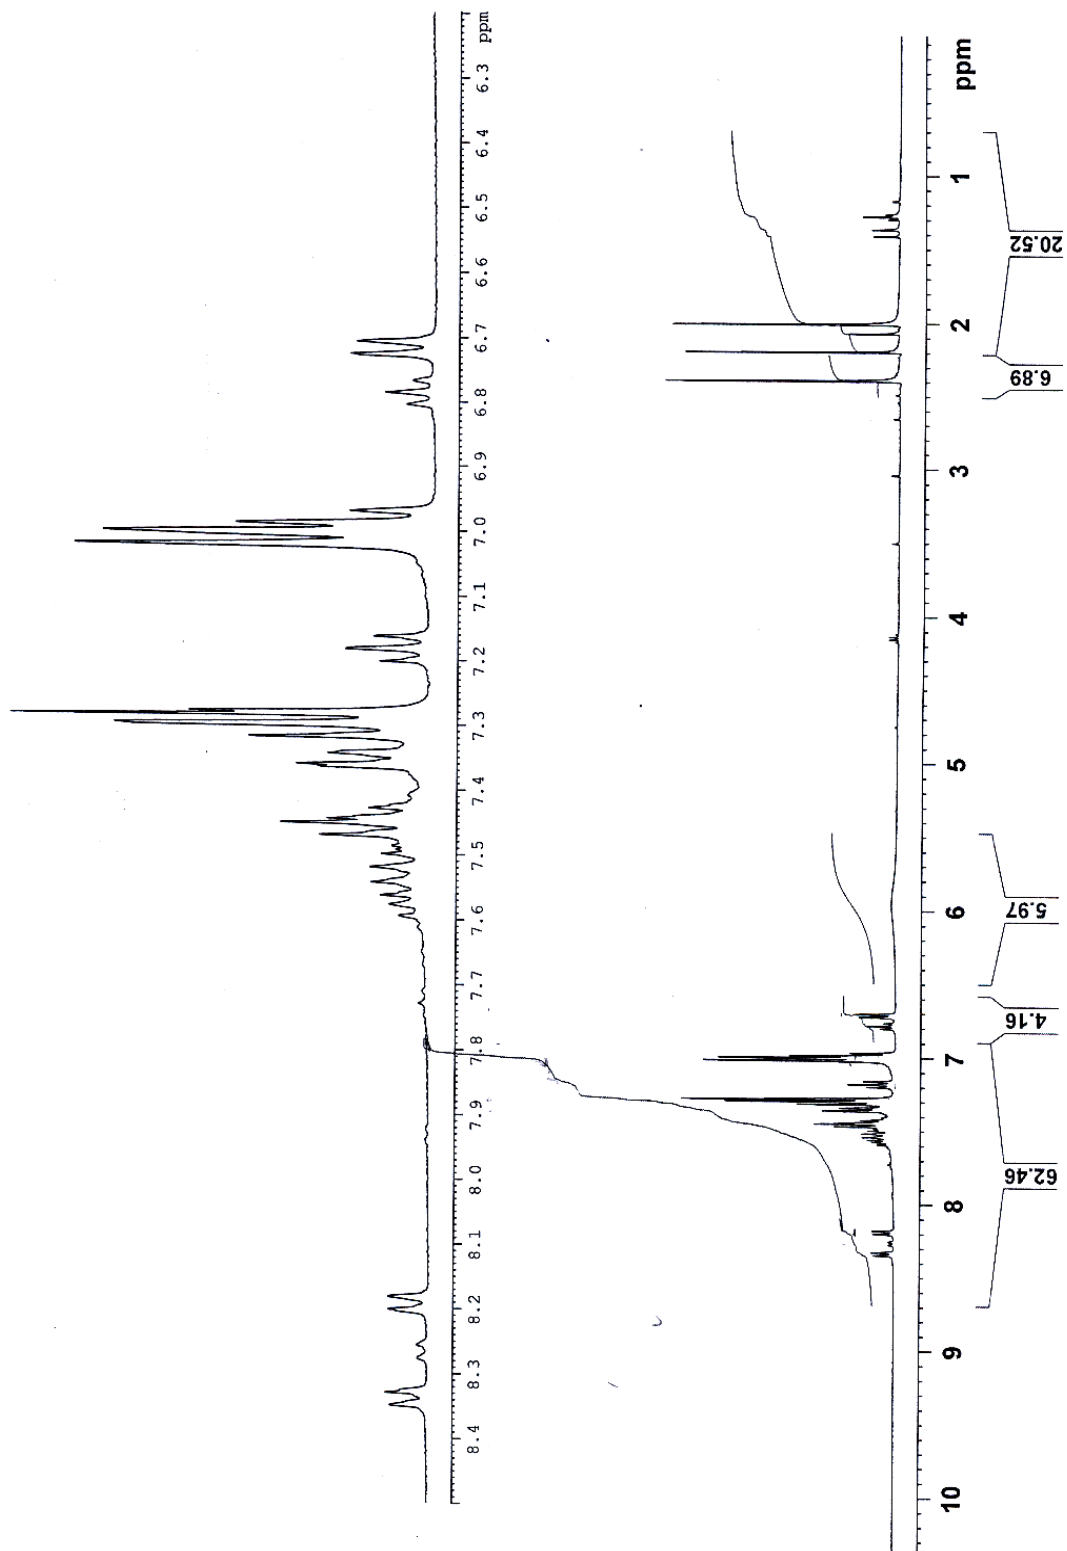

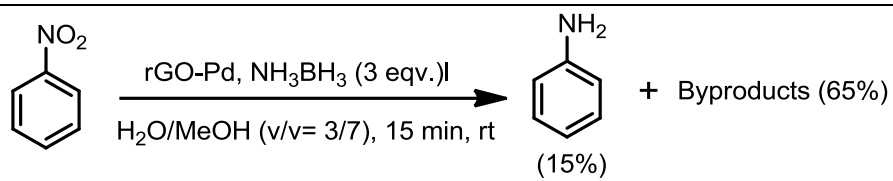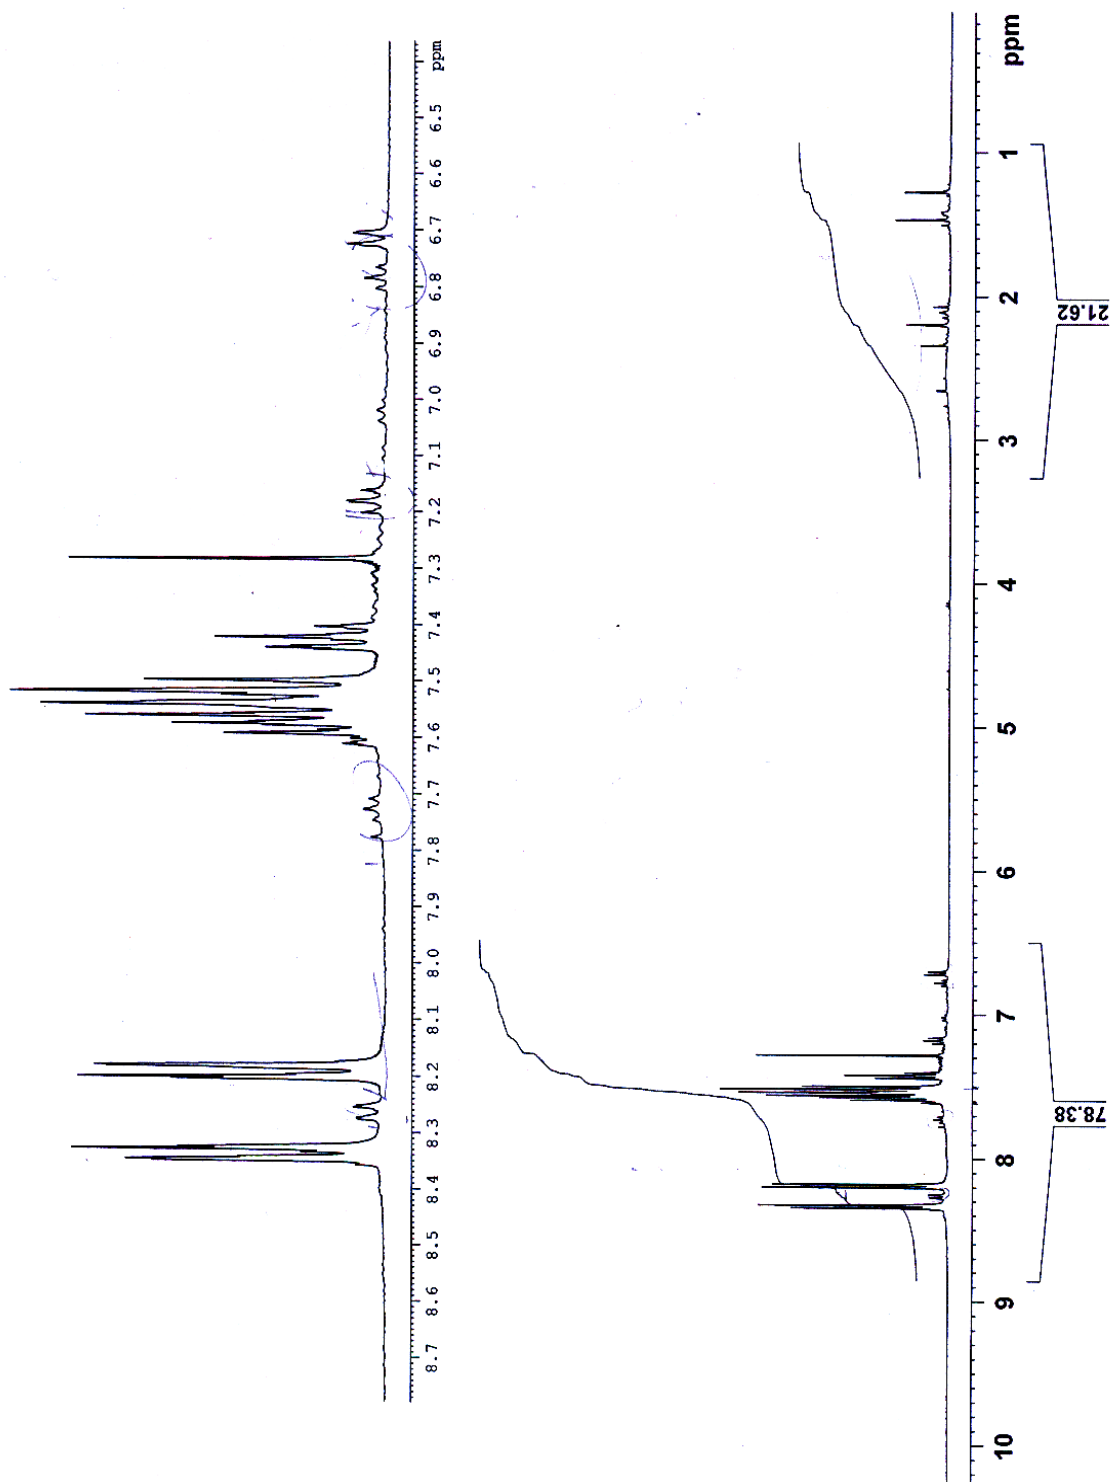

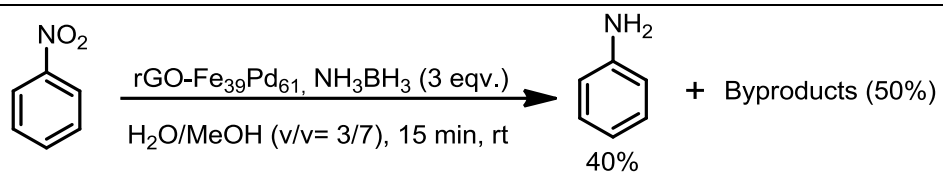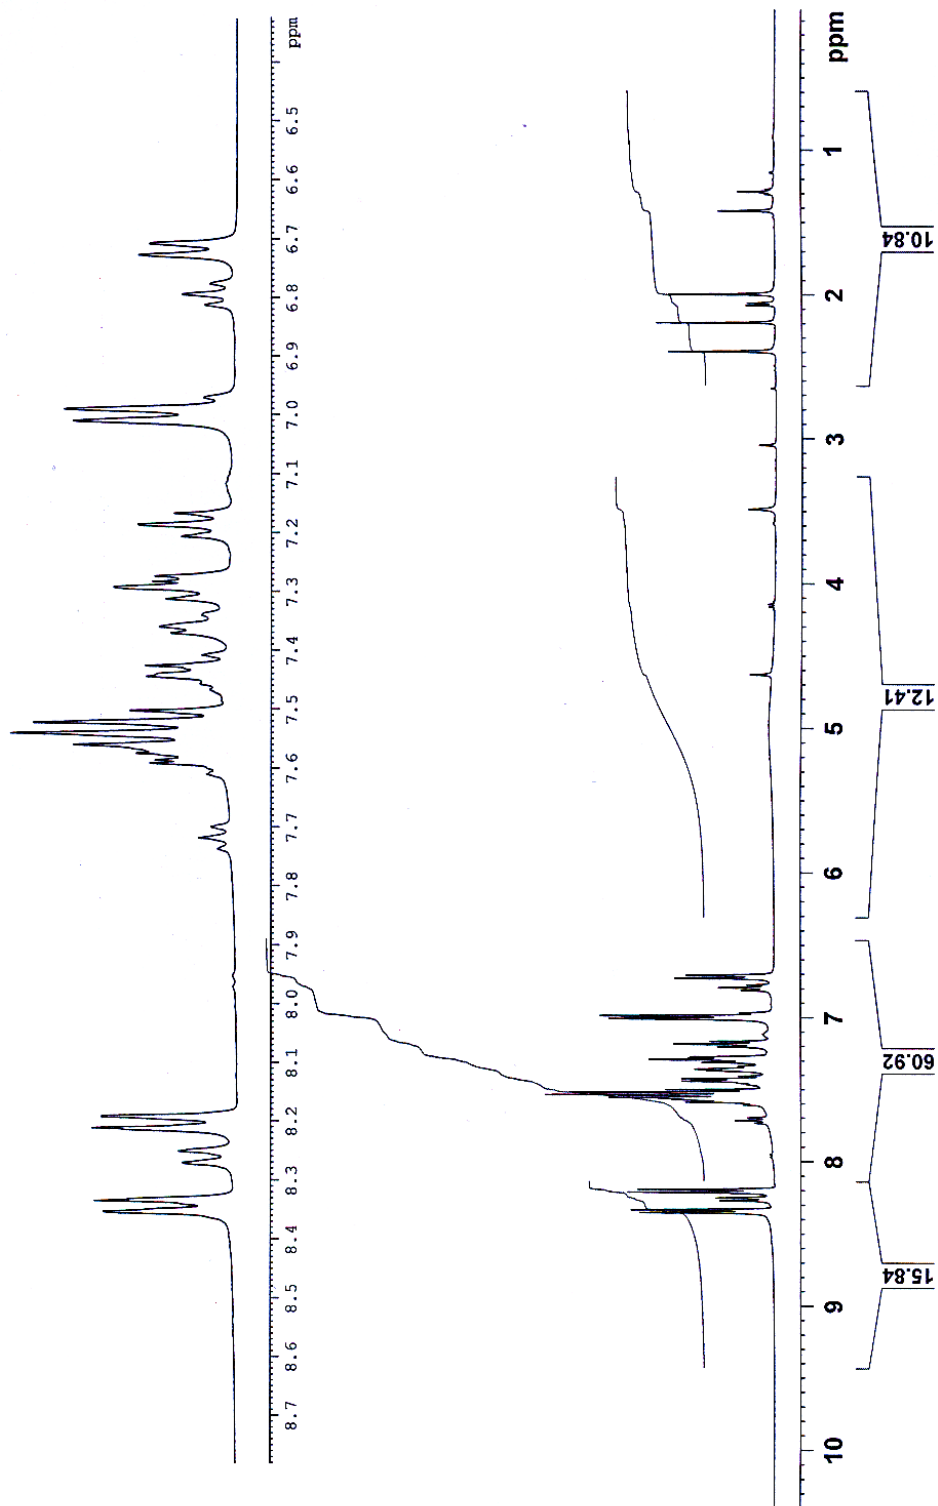

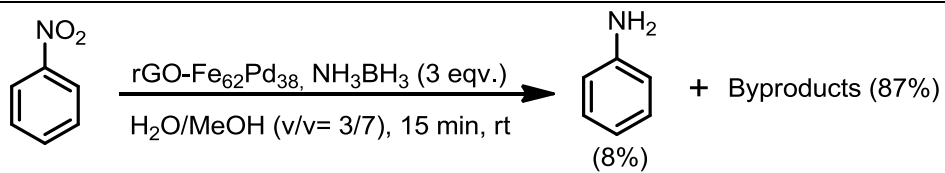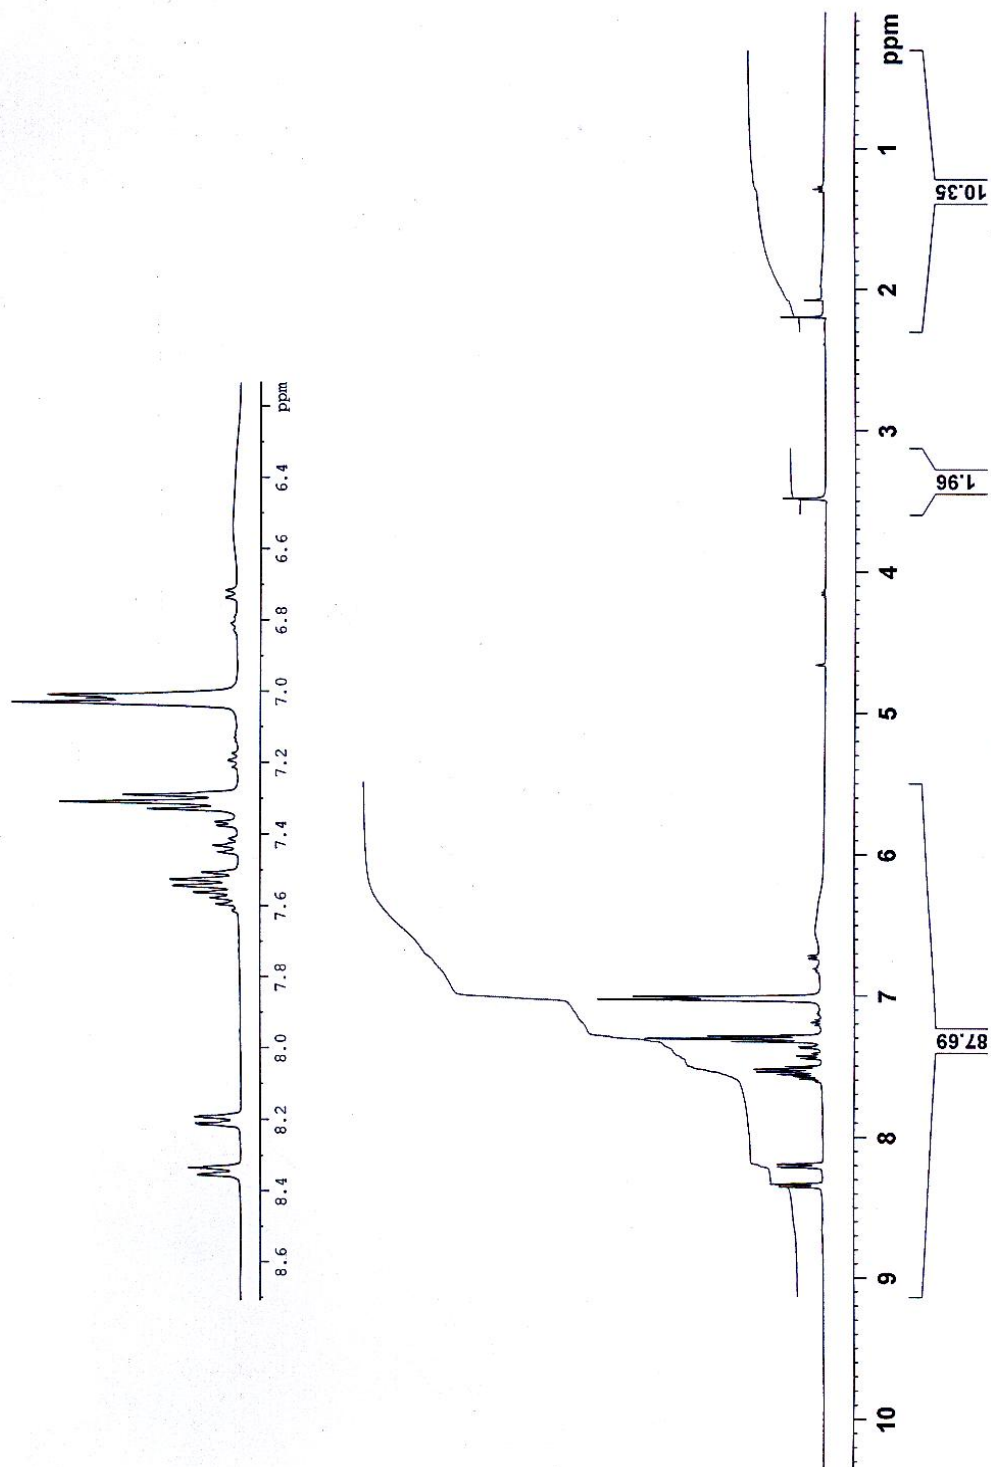

# $^1\text{H}$ -NMR and $^{13}\text{C}$ -NMR spectra of the byproducts

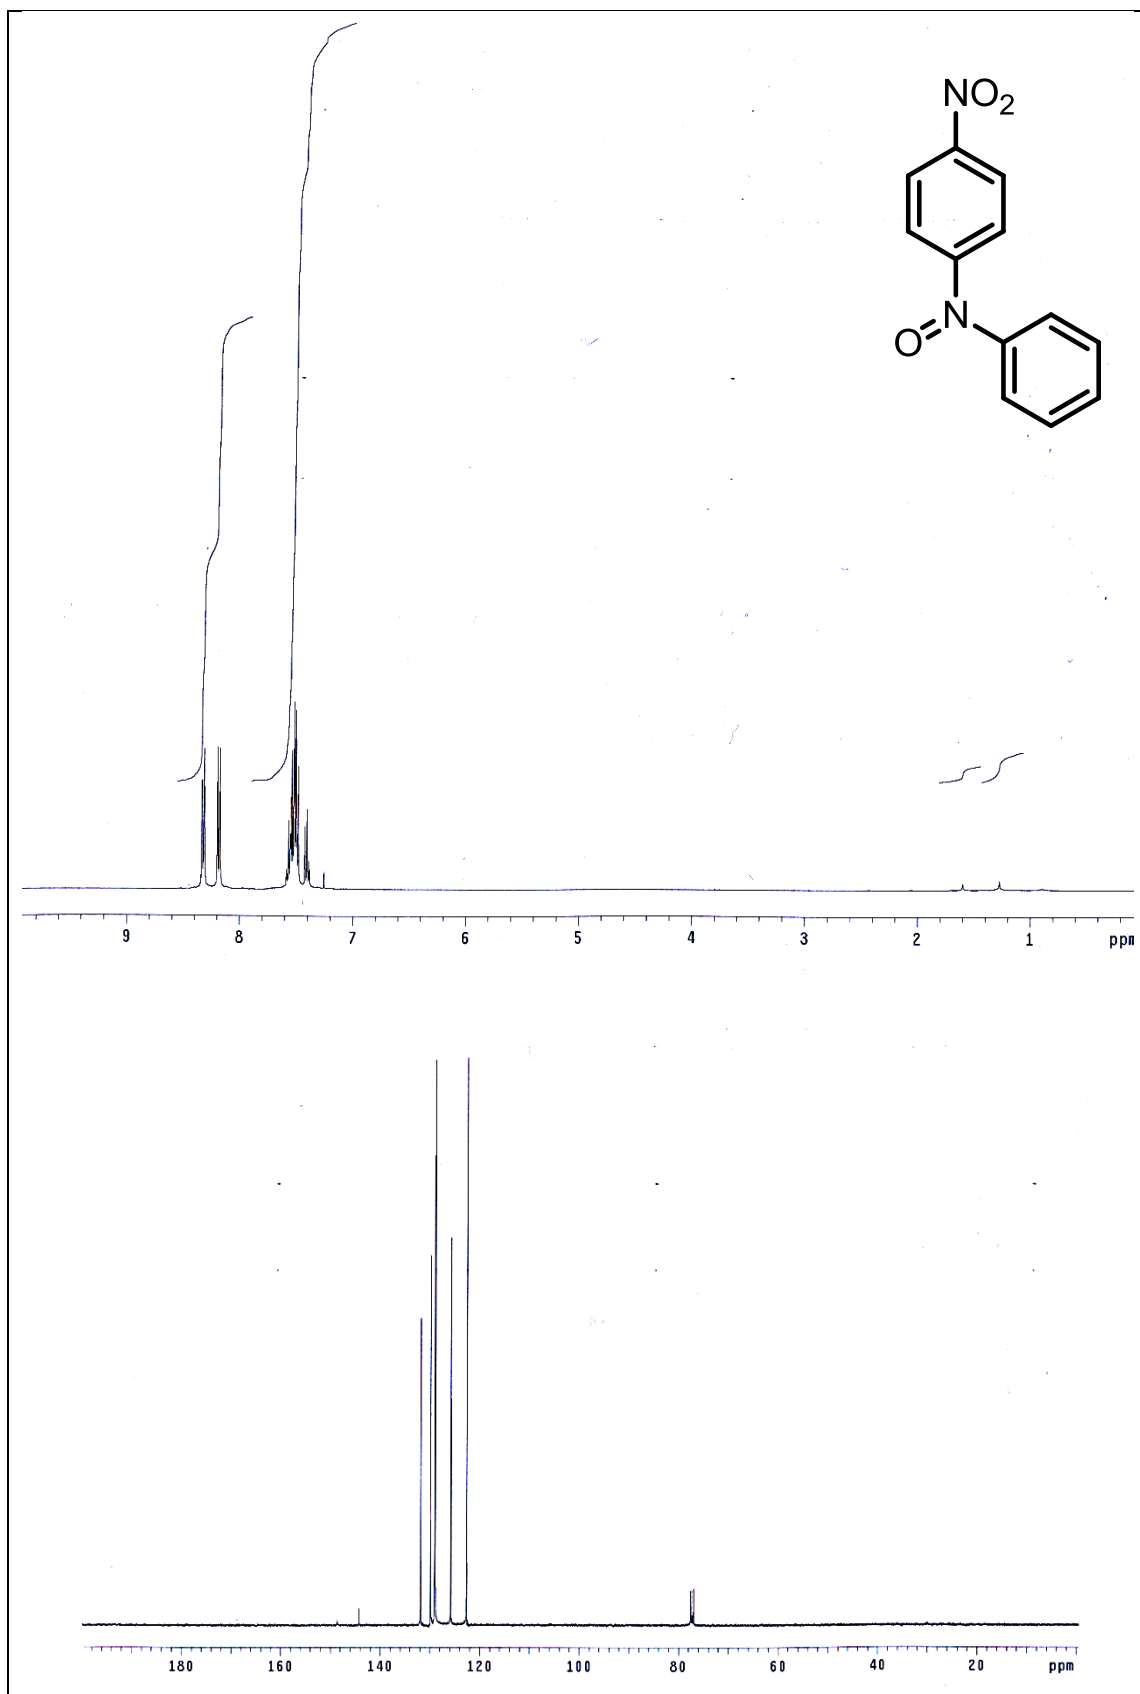



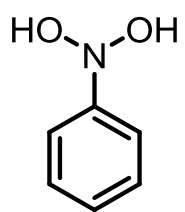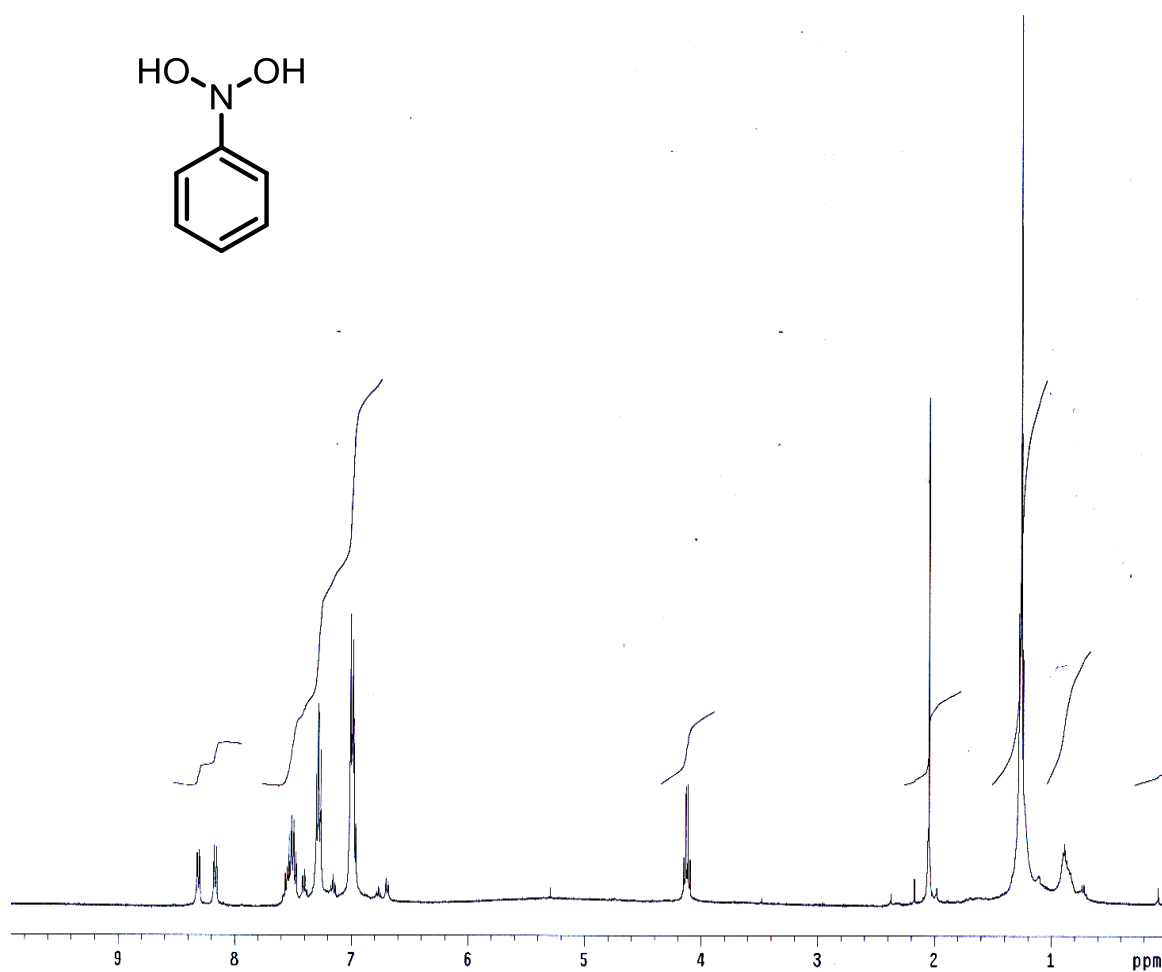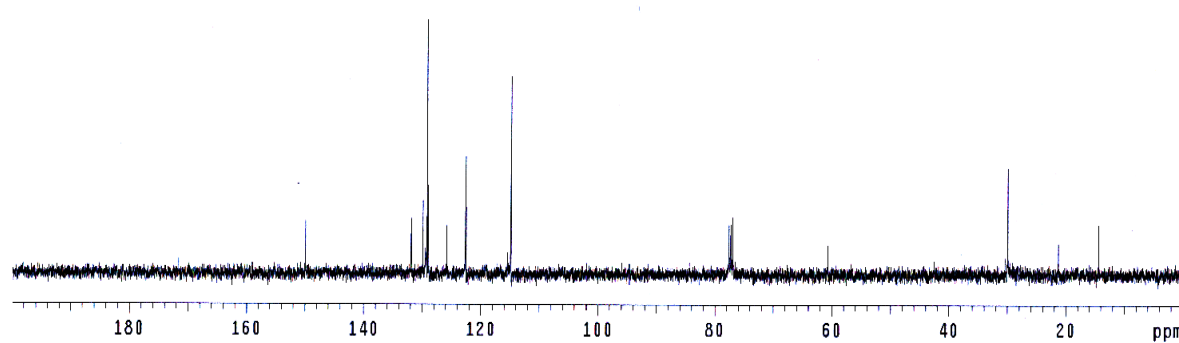

Supplement: c6cy00118a1.pdf [file c6cy00118a1.pdf]
